# Supplementary figures and images for: Cooperative regulation of C1-domain membrane recruitment polarizes atypical protein kinase C
Source: PubMed Central journal article supplement — J Cell Biol. 2023 Aug 17;222(10):e202112143. doi: 10.1083/jcb.202112143 (PMC10435729; doi:10.1083/jcb.202112143), 2023-08-17

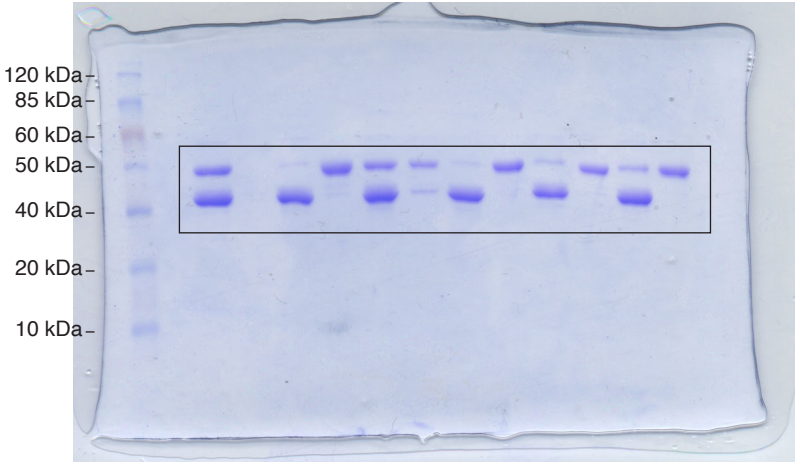

Supplement: JCB_202112143_SourceDataF5.pdf [file JCB_202112143_SourceDataF5.pdf]
